# Supplementary material for: Preliminary Phytochemical Profile and Bioactivity of Inga jinicuil Schltdl & Cham. ex G. Don
Source: MDPI journal article supplement (doi:10.3390/plants11060794), 2022-03-17
Supplement: s1 [file s1]

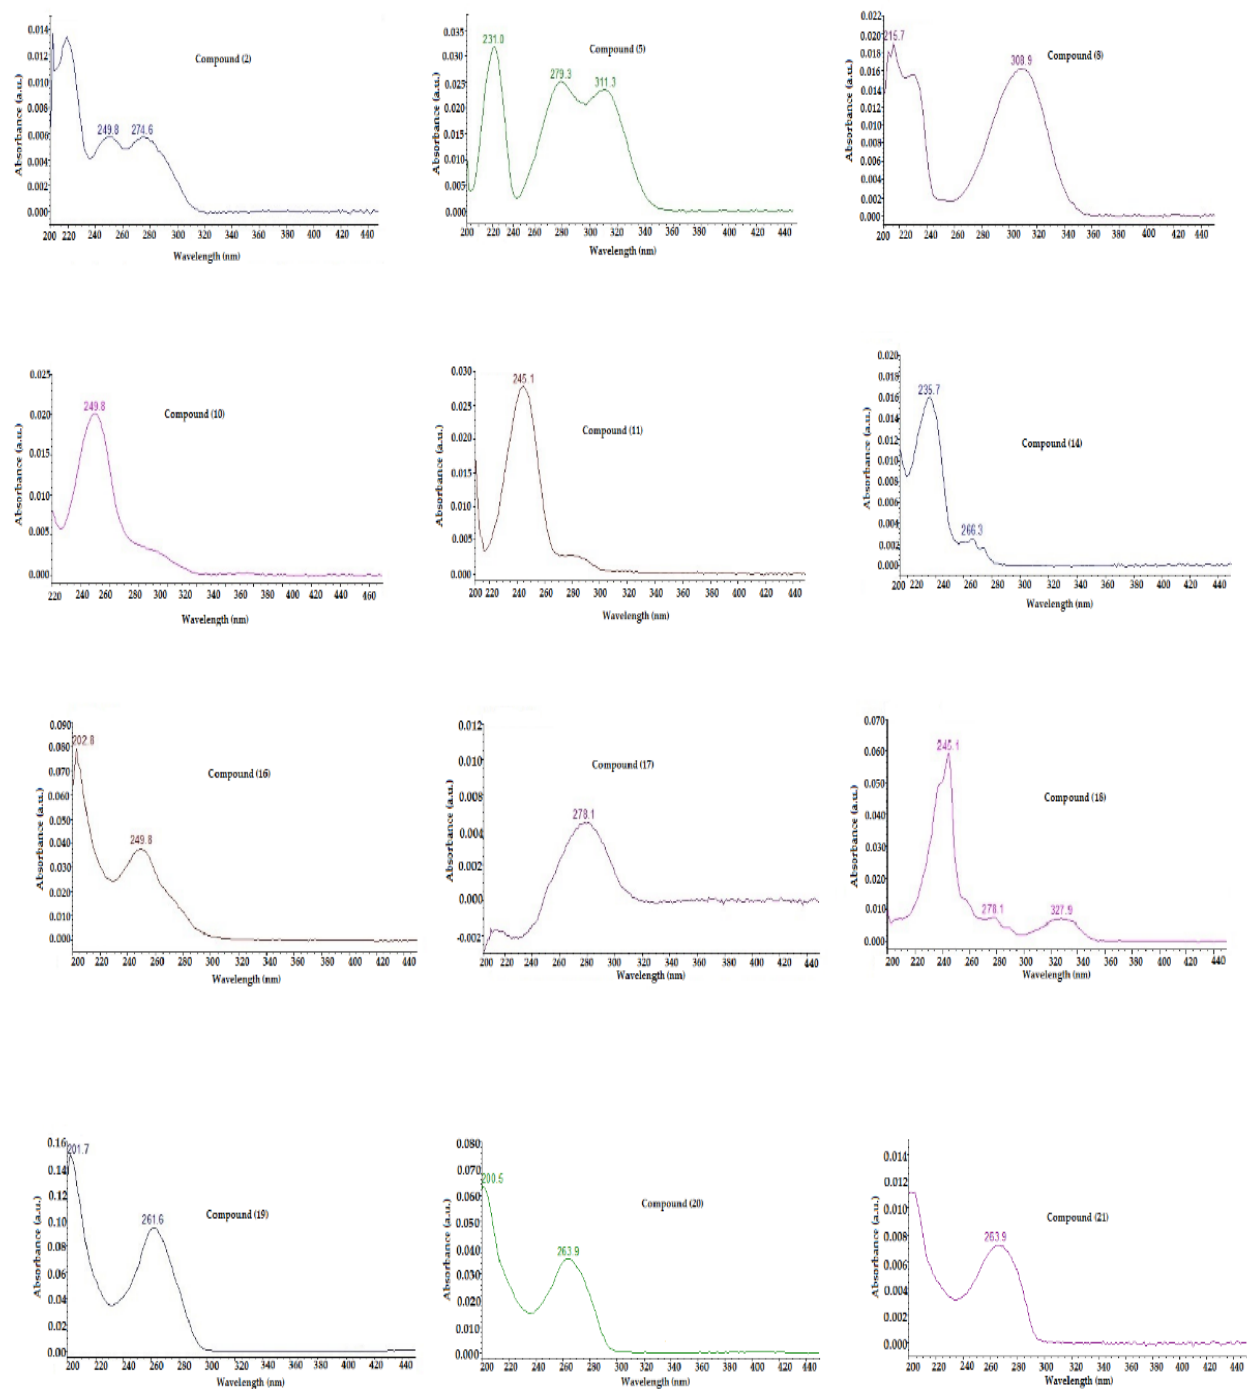

Figure S1: UV-spectra of the main compounds of (Ij-BD) *I. jinicuil*

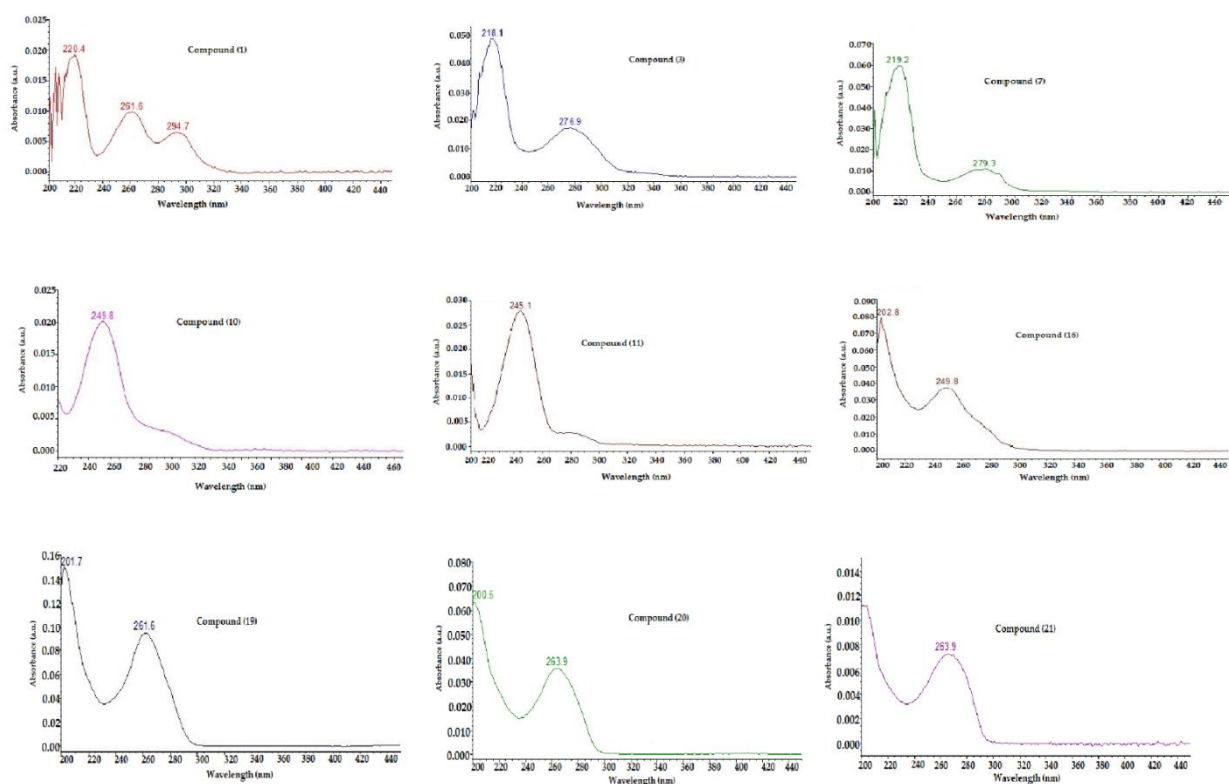

Figure S2: UV-spectra of the main compounds of (Ij-BHac) *I. jinicuil*

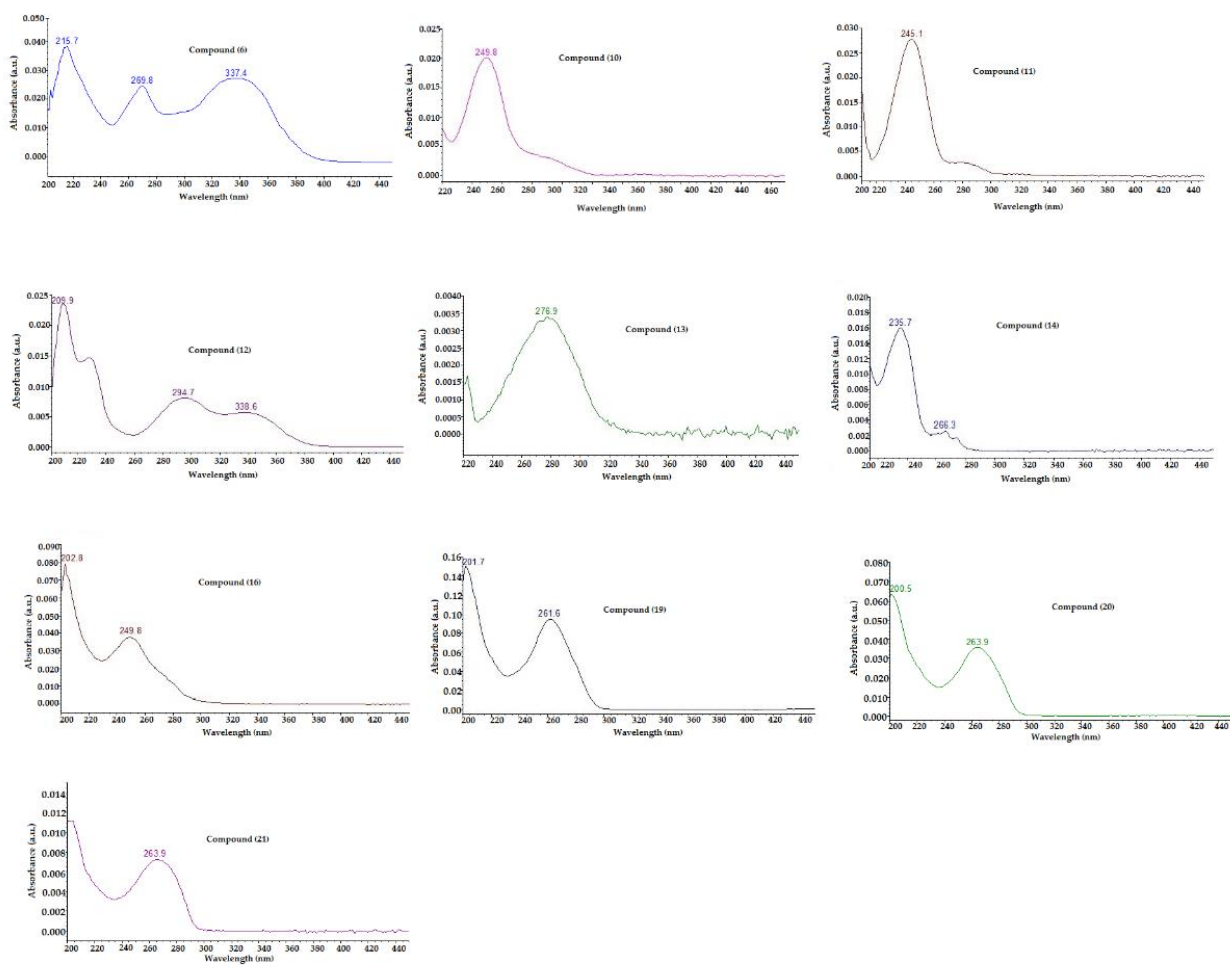

Figure S3: UV-spectra of the main compounds of (Ij-LD) *I. jinicuil*

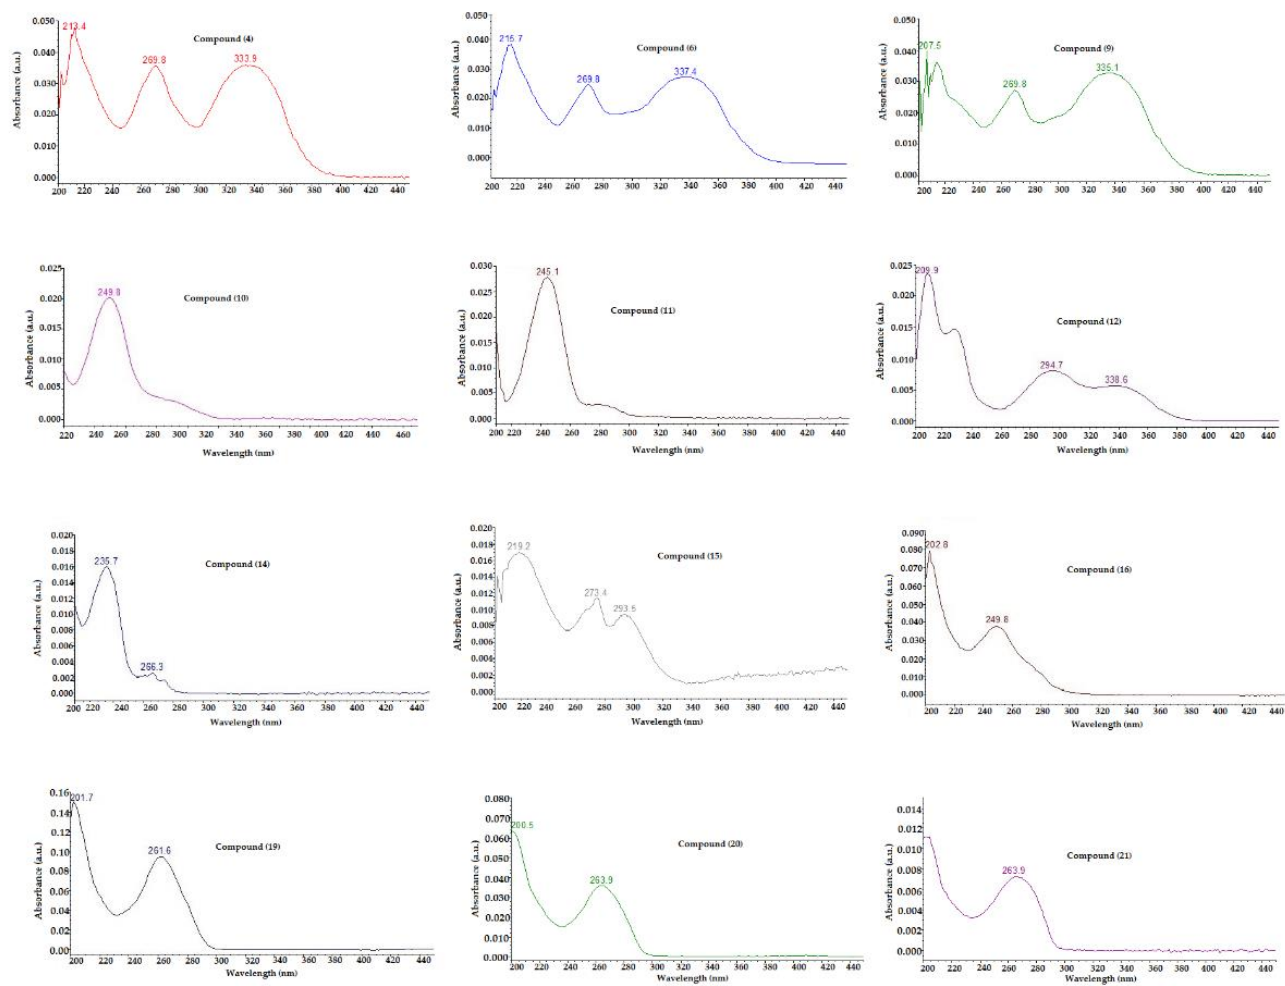

Figure S4: UV-spectra of the main compounds of (Ij-LHac) *I. jinicuil*
